# Supplementary material
Source: PubMed Central journal article supplement (PMC8032559)
Supplement: BioProtoc-11-06-3965-s001.pdf [file BioProtoc-11-06-3965-s001.pdf]

TIME DURATION DISCRIMINATION TASK

10 s (+ Tone)à left arm

20 s (+ Tone)à right arm

DATE:

RAT NUMBER:

# DAY OF THE EXPERIMENT:

| TRIAL | TONE DURATION | LEFT | RIGHT |
|-------|---------------|------|-------|
| 1     | 10            |      |       |
| 2     | 20            |      |       |
| 3     | 20            |      |       |
| 4     | 10            |      |       |
| 5     | 20            |      |       |
| 6     | 10            |      |       |
| 7     | 20            |      |       |
| 8     | 20            |      |       |
| 9     | 10            |      |       |
| 10    | 20            |      |       |

| TRIAL | TONE DURATION | LEFT | RIGHT |
|-------|---------------|------|-------|
| 11    | 10            |      |       |
| 12    | 10            |      |       |
| 13    | 20            |      |       |
| 14    | 10            |      |       |
| 15    | 20            |      |       |
| 16    | 20            |      |       |
| 17    | 10            |      |       |
| 18    | 10            |      |       |
| 19    | 20            |      |       |
| 20    | 10            |      |       |

| TRIAL | TONE DURATION | LEFT | RIGHT |
|-------|---------------|------|-------|
| 21    | 20            |      |       |
| 22    | 10            |      |       |
| 23    | 10            |      |       |
| 24    | 20            |      |       |
| 25    | 10            |      |       |
| 26    | 20            |      |       |
| 27    | 20            |      |       |
| 28    | 10            |      |       |
| 29    | 10            |      |       |
| 30    | 10            |      |       |

| TRIAL | TONE DURATION | LEFT | RIGHT |
|-------|---------------|------|-------|
| 31    | 20            |      |       |
| 32    | 20            |      |       |
| 33    | 10            |      |       |
| 34    | 20            |      |       |
| 35    | 10            |      |       |
| 36    | 20            |      |       |
| 37    | 20            |      |       |
| 38    | 10            |      |       |
| 39    | 10            |      |       |
| 40    | 20            |      |       |

|  |           |
|--|-----------|
|  | CORRECT   |
|  | INCORRECT |
